# Supplementary material for: Exosomes from Human Placenta Choriodecidual Membrane-Derived Mesenchymal Stem Cells Mitigate Endoplasmic Reticulum Stress, Inflammation, and Lung Injury in Lipopolysaccharide-Treated Obese Mice
Source: MDPI journal article supplement (doi:10.3390/antiox11040615), 2022-03-23
Supplement: s1 [file s1]

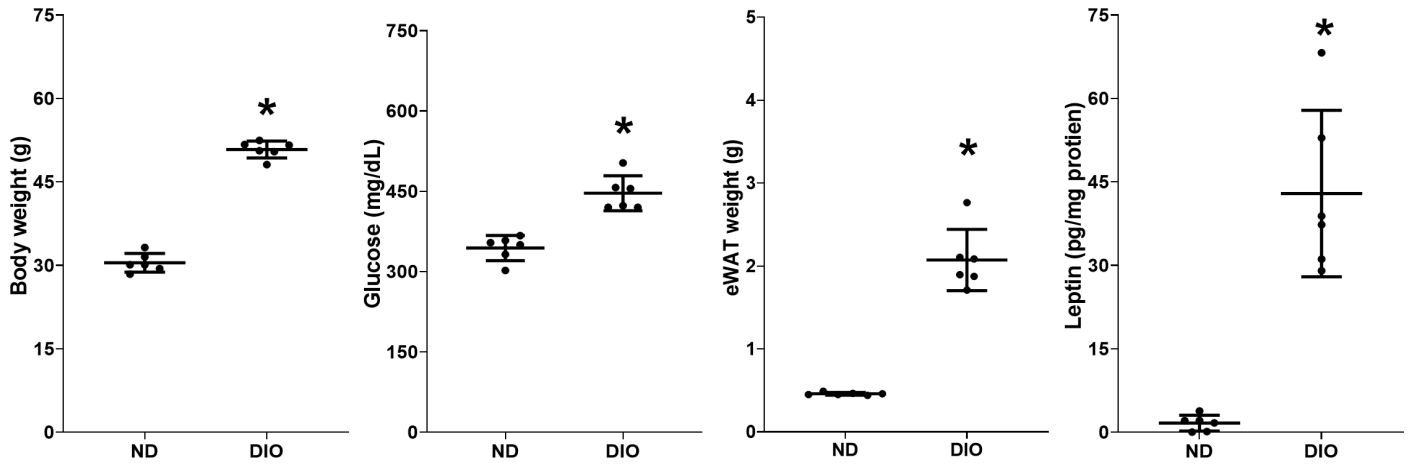

Figure S1. Body weight, blood glucose level, fat adipose weight (epididymal white adipose tissue [eWat]), and leptin concentration in high-fat diet-induced obese mice compared to normal diet non-obese mice. All assays were performed after a 12-week feeding of high-fat diet or normal diet. The leptin concentration in lung tissue was analyzed using enzyme-linked immunosorbent assay. Data were presented as means  $\pm$  standard deviations. ND: the normal diet non-obese group. DIO: the high-fat diet-induced obese group. \*  $p < 0.05$  the DIO group versus the ND group.

**Fig 1**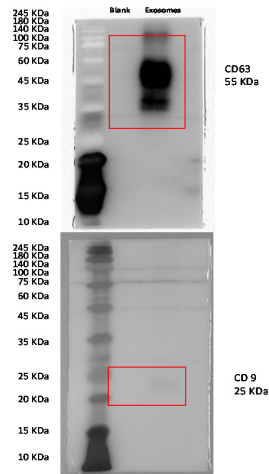**Fig 4**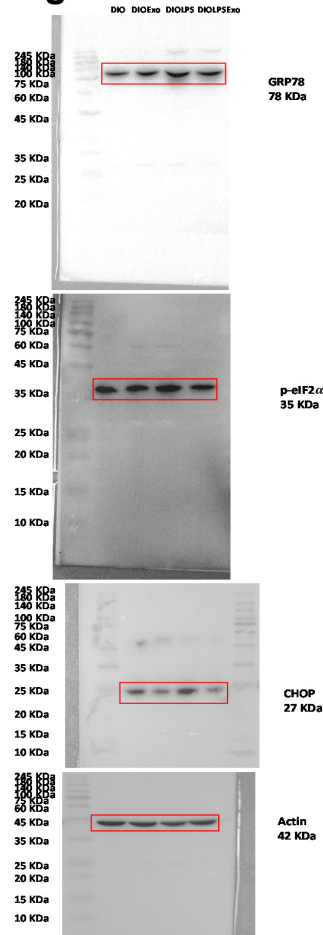**Fig 5**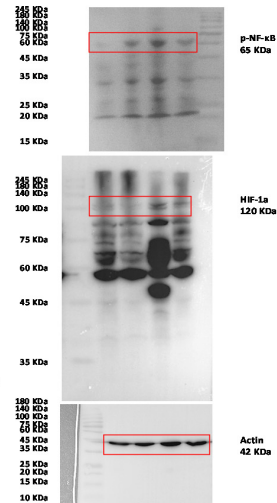

Figure S2. Uncropped representative gel photography of immunoblotting assay, presented in Figure 1, Figure 4, and Figure 5. GRP78: glucose-regulated protein 78. p-eIF2 $\alpha$ : phosphorylated eukaryotic initiation factor 2 $\alpha$ . CHOP: C/EBP homologous protein. p-NF- $\kappa$ B: phosphorylated nuclear factor- $\kappa$ B. HIF-1 $\alpha$ : hypoxia-inducible factor-1 $\alpha$ .
